# Supplementary material for: Structural Characterization of Full-Length Human Dehydrodolichyl Diphosphate Synthase Using an Integrative Computational and Experimental Approach
Source: MDPI journal article supplement (doi:10.3390/biom9110660), 2019-10-28
Supplement: s1 [file s1]

1 *Supplementary data for*

2 **Structural characterization of full-length human**  
 3 **dehydrodolichyl diphosphate synthase using an**  
 4 **integrative computational and experimental approach**

5 **Michal Lisnyansky Bar-El<sup>1</sup>, Su Youn Lee<sup>2</sup>, Ah Young Ki<sup>2</sup>, Noa Kapelushnik<sup>3</sup>, Anat Loewenstein<sup>4</sup>,**  
 6 **Ka Young Chung<sup>2</sup>, Dina Schneidman-Duhovny<sup>5,6</sup>, Moshe Giladi<sup>1,7,¶,\*</sup>, Hadas Newman<sup>4,¶</sup>, Yoni**  
 7 **Haitin<sup>1,¶,\*</sup>**

8 <sup>1</sup> Department of Physiology and Pharmacology, Sackler Faculty of Medicine, Tel-Aviv University, Tel-Aviv,  
 9 Israel

10 <sup>2</sup> School of Pharmacy, Sungkyunkwan University, Jangan-gu, Suwon, South Korea

11 <sup>3</sup> Department of Ophthalmology, Sheba Medical Center, Ramat Gan, Israel

12 <sup>4</sup> Department of Ophthalmology, Tel-Aviv Sourasky Medical Center, Tel Aviv, Israel

13 <sup>5</sup> Department of Biological Chemistry, Institute of Life Sciences, The Hebrew University of Jerusalem,  
 14 Jerusalem, Israel

15 <sup>6</sup> School of Computer Science and Engineering, The Hebrew University of Jerusalem, Jerusalem, Israel

16 <sup>7</sup> Tel Aviv Sourasky Medical Center, Tel Aviv, Israel

17 <sup>¶</sup> These authors contributed equally to this work.

18  
 19 \* Correspondence: [moshegil@post.tau.ac.il](mailto:moshegil@post.tau.ac.il) (MG), [yhaitin@tauex.tau.ac.il](mailto:yhaitin@tauex.tau.ac.il) (YH)

20

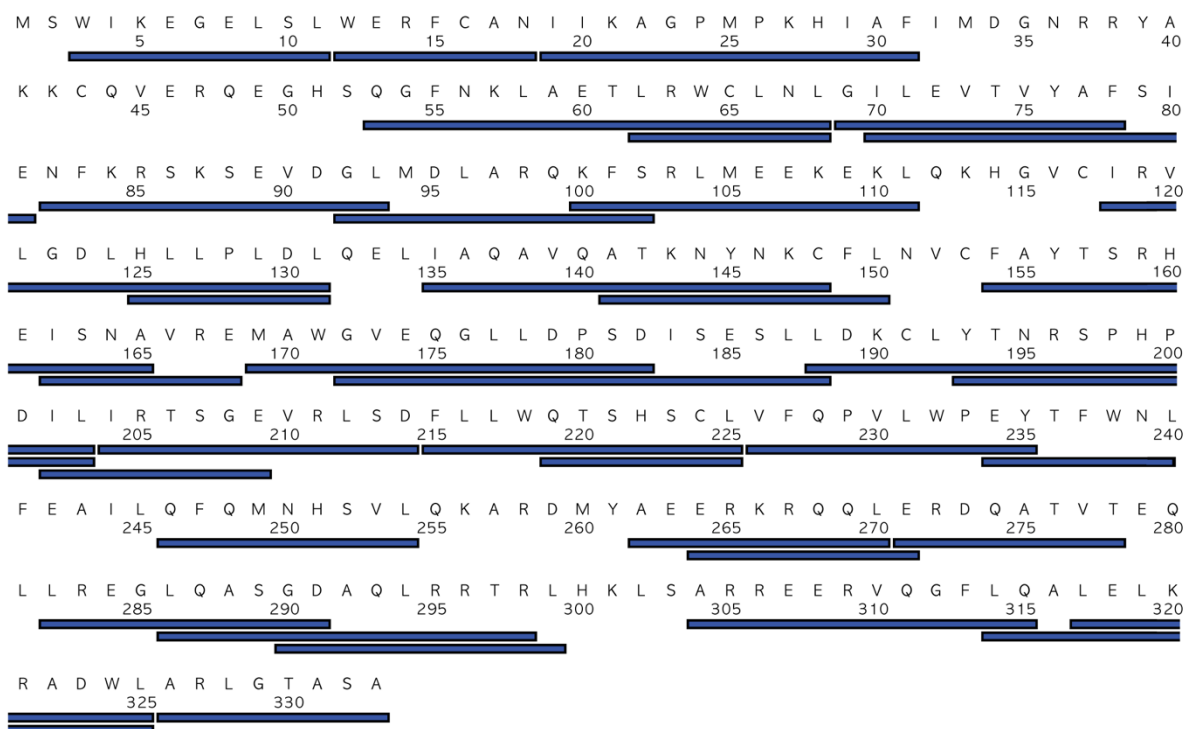

21 Total: 83.5% Coverage

22 **Figure S1. HDX-MS analysis of human DHDDS. Sequence coverage of human DHDDS.**

23

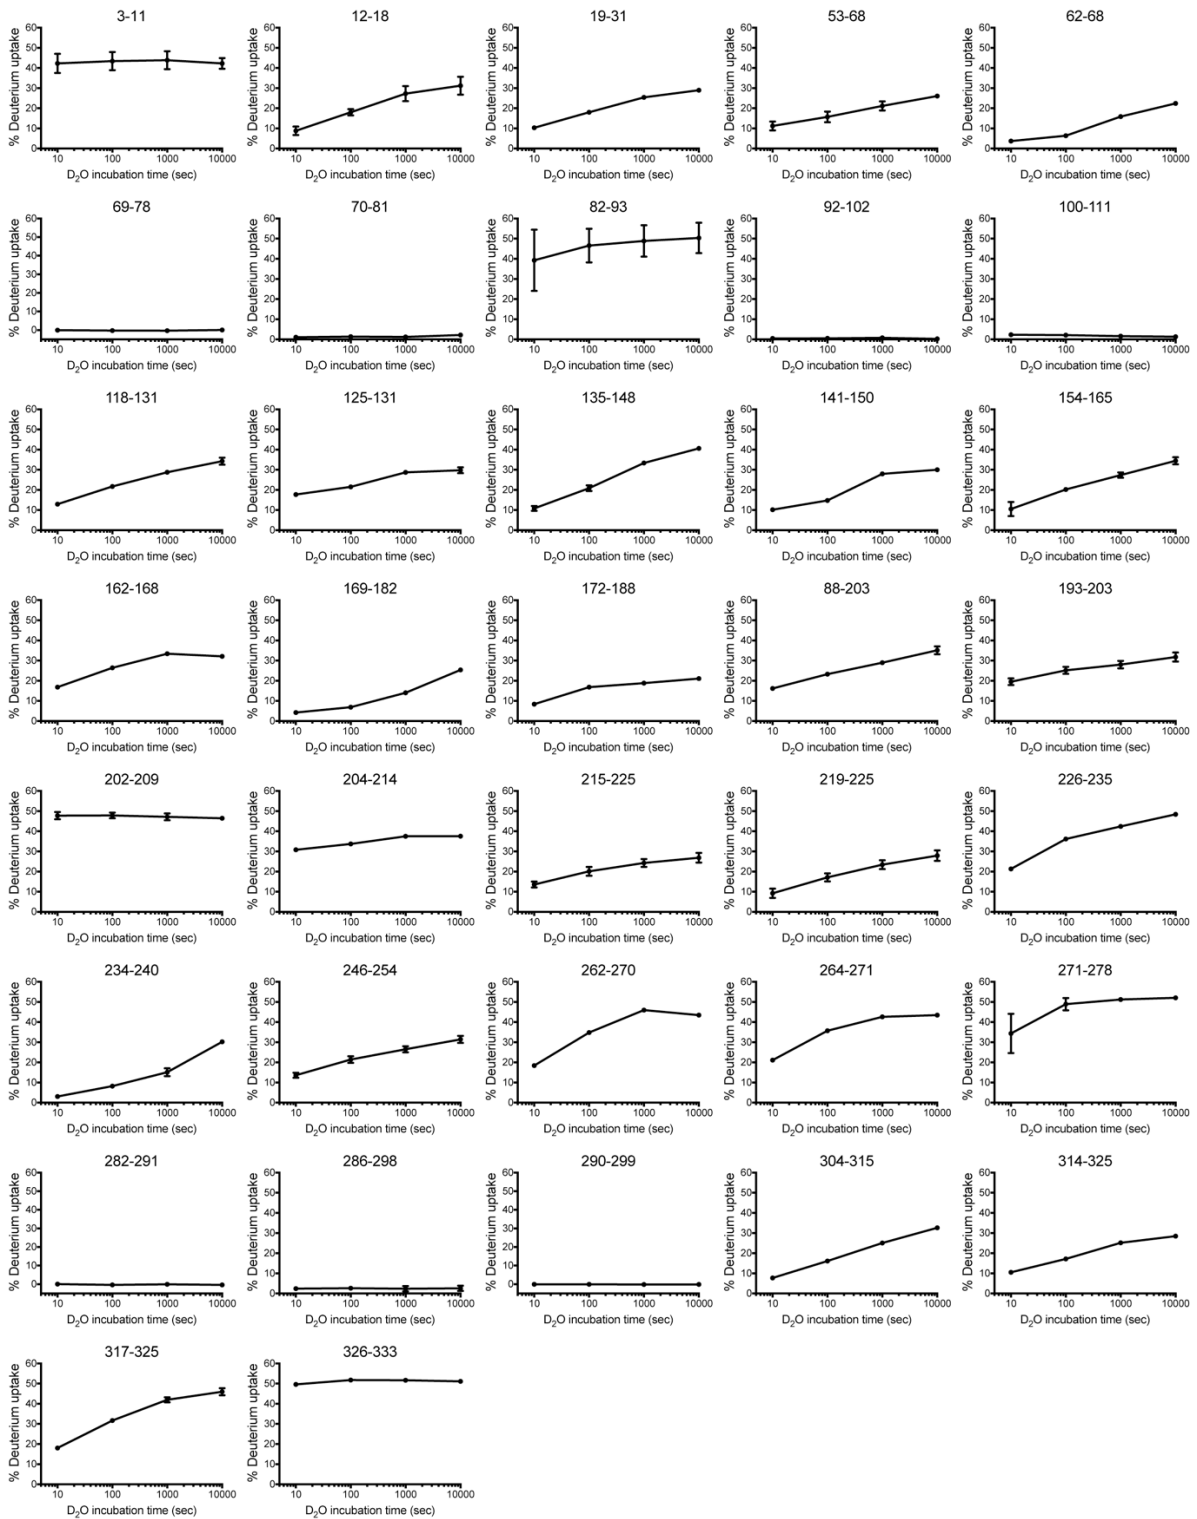

24

25

Figure S2. HDX-MS analysis of human DHDDS. Deuterium uptake plots.
